# Supplementary material for: Development of End-to-End Artificial Intelligence Models for Surgical Planning in Transforaminal Lumbar Interbody Fusion
Source: MDPI journal article supplement (doi:10.3390/bioengineering11020164), 2024-02-08
Supplement: s1 [file s1]

**Table S1.** Spinal parameter features extracted using a deep learning model.

| No. | Feature                                                  | Abbreviation | Description                                                                                                                                                                                                               |
|-----|----------------------------------------------------------|--------------|---------------------------------------------------------------------------------------------------------------------------------------------------------------------------------------------------------------------------|
| 1   | Anterior intervertebral height at the L1-L2 level        | L1L2_ant     | Distance of the perpendicular line extending from the anterior edge of the L1 inferior endplate to the straight line tangent to the L2 superior endplate                                                                  |
| 2   | Intervertebral height at the midpoint of the L1-L2 level | L1L2_mid     | Distance of the perpendicular line extending from the midpoint of the L1 inferior endplate to the straight line tangent to the L2 superior endplate                                                                       |
| 3   | Posterior intervertebral height at the L1-L2 level       | L1L2_post    | Distance of the perpendicular line extending from the posterior edge of the L1 inferior endplate to the straight line tangent to the L2 superior endplate                                                                 |
| 4   | Anterior intervertebral height at the L2-L3 level        | L2L3_ant     | Distance of the perpendicular line extending from the anterior edge of the L2 inferior endplate to the straight line tangent to the L3 superior endplate                                                                  |
| 5   | Intervertebral height at the midpoint of the L2-L3 level | L2L3_mid     | Distance of the perpendicular line extending from the midpoint of the L2 inferior endplate to the straight line tangent to the L3 superior endplate                                                                       |
| 6   | Posterior intervertebral height at the L2-L3 level       | L2L3_post    | Distance of the perpendicular line extending from the posterior edge of the L2 inferior endplate to the straight line tangent to the L3 superior endplate                                                                 |
| 7   | Anterior intervertebral height at the L3-L4 level        | L3L4_ant     | Distance of the perpendicular line extending from the anterior edge of the L3 inferior endplate to the straight line tangent to the L4 superior endplate                                                                  |
| 8   | Intervertebral height at the midpoint of the L3-L4 level | L3L4_mid     | Distance of the perpendicular line extending from the midpoint of the L3 inferior endplate to the straight line tangent to the L4 superior endplate                                                                       |
| 9   | Posterior intervertebral height at the L3-L4 level       | L3L4_post    | Distance of the perpendicular line extending from the posterior edge of the L3 inferior endplate to the straight line tangent to the L4 superior endplate                                                                 |
| 10  | Anterior intervertebral height at the L4-L5 level        | L4L5_ant     | Distance of the perpendicular line extending from the anterior edge of the L4 inferior endplate to the straight line tangent to the L5 superior endplate                                                                  |
| 11  | Intervertebral height at the midpoint of the L4-L5 level | L4L5_mid     | Distance of the perpendicular line extending from the midpoint of the L4 inferior endplate to the straight line tangent to the L5 superior endplate                                                                       |
| 12  | Posterior intervertebral height at the L4-L5 level       | L4L5_post    | Distance of the perpendicular line extending from the posterior edge of the L4 inferior endplate to the straight line tangent to the L5 superior endplate                                                                 |
| 13  | Anterior intervertebral height at the L5-S1 level        | L5S1_ant     | Distance of the perpendicular line extending from the anterior edge of the L5 inferior endplate to the straight line tangent to the S1 superior endplate                                                                  |
| 14  | Intervertebral height at the midpoint of the L5-S1 level | L5S1_mid     | Distance of the perpendicular line extending from the midpoint of the L5 inferior endplate to the straight line tangent to the S1 superior endplate                                                                       |
| 15  | Posterior intervertebral height at the L5-S1 level       | L5S1_post    | Distance of the perpendicular line extending from the posterior edge of the L5 inferior endplate to the straight line tangent to the S1 superior endplate                                                                 |
| 16  | Pelvic incidence                                         | PI           | Angle between the line drawn perpendicularly to the sacral endplate at its midpoint and the line joining the center of the femoral heads (midpoint of the bicoxofemoral axis) to the same midpoint of the sacral endplate |
| 17  | Lumbar lordosis                                          | LL           | Angle between the superior endplates of L1 and S1                                                                                                                                                                         |
| 18  | Pelvic incidence minus lumbar lordosis before surgery    | PImLL_before | Subtraction of preoperative pelvic incidence and preoperative lumbar lordosis                                                                                                                                             |

|    |                                 |               |                                                                                                                                                         |
|----|---------------------------------|---------------|---------------------------------------------------------------------------------------------------------------------------------------------------------|
| 19 | Lower lumbar lordotic arc       | L4S1 angle    | Angle between the superior endplates of L4 and S1                                                                                                       |
| 20 | Lordosis distribution index     | LDI           | Magnitude of lower-arc lordosis relative to total lordosis, calculated using the formula $L4-S1 \text{ lordosis} / L1-S1 \text{ lordosis} \times 100\%$ |
| 21 | Relative lumbar lordosis        | RLL           | Subtraction of measured LL and optimal LL (optimal LL = $PI \times 0.62 + 29$ )                                                                         |
| 22 | Sacral slope                    | SS            | Angle between the sacral endplate and the horizontal                                                                                                    |
| 23 | Pelvic tilt                     | PT            | Angle between the line joining the midpoint of the sacral endplate to the midpoint of the bicoxofemoral axis and the vertical                           |
| 24 | L1 vertebral angle              | L1 angle      | Angle between the superior and inferior endplates of L1                                                                                                 |
| 25 | L2 vertebral angle              | L2 angle      | Angle between the superior and inferior endplates of L2                                                                                                 |
| 26 | L3 vertebral angle              | L3 angle      | Angle between the superior and inferior endplates of L3                                                                                                 |
| 27 | L4 vertebral angle              | L4 angle      | Angle between the superior and inferior endplates of L4                                                                                                 |
| 28 | L5 vertebral angle              | L5 angle      | Angle between the superior and inferior endplates of L5                                                                                                 |
| 29 | L1-L2 intervertebral disc angle | L1L2 angle    | Angle between the inferior endplate of L1 and the superior endplate of L2                                                                               |
| 30 | L2-L3 intervertebral disc angle | L2L3 angle    | Angle between the inferior endplate of L2 and the superior endplate of L3                                                                               |
| 31 | L3-L4 intervertebral disc angle | L3L4 angle    | Angle between the inferior endplate of L3 and the superior endplate of L4                                                                               |
| 32 | L4-L5 intervertebral disc angle | L4L5 angle    | Angle between the inferior endplate of L4 and the superior endplate of L5                                                                               |
| 33 | L5-S1 intervertebral disc angle | L5S1 angle    | Angle between the inferior endplate of L5 and the superior endplate of S1                                                                               |
| 34 | Upper vertebral width of L1     | L1Width Up    | Distance from the anterior to the posterior edge of the L1 superior endplate                                                                            |
| 35 | Lower vertebral width of L1     | L1Width Down  | Distance from the anterior to the posterior edge of the L1 inferior endplate                                                                            |
| 36 | Upper vertebral width of L2     | L2Width Up    | Distance from the anterior to the posterior edge of the L2 superior endplate                                                                            |
| 37 | Lower vertebral width of L2     | L2Width Down  | Distance from the anterior to the posterior edge of the L2 inferior endplate                                                                            |
| 38 | Upper vertebral width of L3     | L3Width Up    | Distance from the anterior to the posterior edge of the L3 superior endplate                                                                            |
| 39 | Lower vertebral width of L3     | L3Width Down  | Distance from the anterior to the posterior edge of the L3 inferior endplate                                                                            |
| 40 | Upper vertebral width of L4     | L4Width Up    | Distance from the anterior to the posterior edge of the L4 superior endplate                                                                            |
| 41 | Lower vertebral width of L4     | L4Width Down  | Distance from the anterior to the posterior edge of the L4 inferior endplate                                                                            |
| 42 | Upper vertebral width of L5     | L5Width Up    | Distance from the anterior to the posterior edge of the L5 superior endplate                                                                            |
| 43 | Lower vertebral width of L5     | L5Width Down  | Distance from the anterior to the posterior edge of the L5 inferior endplate                                                                            |
| 44 | Anterior height of L1           | L1Height Ant  | Distance from the anterior edge of the L1 superior endplate to the anterior edge of the L1 inferior endplate                                            |
| 45 | Posterior height of L1          | L1Height Post | Distance from the posterior edge of the L1 superior endplate to the posterior edge of the L1 inferior endplate                                          |
| 46 | Anterior height of L2           | L2Height Ant  | Distance from the anterior edge of the L2 superior endplate to the anterior edge of the L2 inferior endplate                                            |
| 47 | Posterior height of L2          | L2Height Post | Distance from the posterior edge of the L2 superior endplate to the posterior edge of the L2 inferior endplate                                          |
| 48 | Anterior height of L3           | L3Height Ant  | Distance from the anterior edge of the L3 superior endplate to the anterior edge of the L3 inferior endplate                                            |
| 49 | Posterior height of L3          | L3Height Post | Distance from the posterior edge of the L3 superior endplate to the posterior edge of the L3 inferior endplate                                          |
| 50 | Anterior height of L4           | L4Height Ant  | Distance from the anterior edge of the L4 superior endplate to the anterior edge of the L4 inferior endplate                                            |
| 51 | Posterior height of L4          | L4Height Post | Distance from the posterior edge of the L4 superior endplate to the posterior edge of the L4 inferior endplate                                          |
| 52 | Anterior height of L5           | L5Height Ant  | Distance from the anterior edge of the L5 superior endplate to the anterior edge of the L5 inferior endplate                                            |
| 53 | Posterior height of L5          | L5Height Post | Distance from the posterior edge of the L5 superior endplate to the posterior edge of the L5 inferior endplate                                          |

**Table S2.** ICCs validating the reliability of the deep learning model in measuring bone distance parameters compared with the MRI results of two authors (Anh Tuan Bui, Giam Minh Trinh).

| No. | Feature       | ICC (95% confidence interval) |
|-----|---------------|-------------------------------|
| 1   | L1Width Up    | 0.929 (0.913–0.942)           |
| 2   | L1Width Down  | 0.941 (0.928–0.952)           |
| 3   | L2Width Up    | 0.879 (0.653–0.941)           |
| 4   | L2Width Down  | 0.829 (0.763–0.874)           |
| 5   | L3Width Up    | 0.905 (0.883–0.923)           |
| 6   | L3Width Down  | 0.914 (0.895–0.93)            |
| 7   | L4Width Up    | 0.89 (0.867–0.91)             |
| 8   | L4Width Down  | 0.901 (0.881–0.919)           |
| 9   | L5Width Up    | 0.86 (0.831–0.886)            |
| 10  | L5Width Down  | 0.855 (0.823–0.881)           |
| 11  | L1Height Ant  | 0.831 (0.794–0.862)           |
| 12  | L1Height Post | 0.887 (0.863–0.908)           |
| 13  | L2Height Ant  | 0.881 (0.851–0.905)           |
| 14  | L2Height Post | 0.78 (0.723–0.824)            |
| 15  | L3Height Ant  | 0.79 (0.738–0.831)            |
| 16  | L3Height Post | 0.947 (0.936–0.957)           |
| 17  | L4Height Ant  | 0.921 (0.904–0.936)           |
| 18  | L4Height Post | 0.84 (0.807–0.869)            |
| 19  | L5Height Ant  | 0.945 (0.934–0.955)           |
| 20  | L5Height Post | 0.832 (0.772–0.874)           |
| 21  | L1L2 ant      | 0.925 (0.877–0.951)           |
| 22  | L1L2 mid      | 0.883 (0.857–0.905)           |
| 23  | L1L2 post     | 0.881 (0.856–0.903)           |
| 24  | L2L3 ant      | 0.916 (0.898–0.931)           |
| 25  | L2L3 mid      | 0.897 (0.876–0.916)           |
| 26  | L2L3 post     | 0.915 (0.898–0.93)            |
| 27  | L3L4 ant      | 0.905 (0.884–0.923)           |
| 28  | L3L4 mid      | 0.885 (0.859–0.906)           |
| 29  | L3L4 post     | 0.935 (0.92–0.948)            |
| 30  | L4L5 ant      | 0.945 (0.92–0.96)             |
| 31  | L4L5 mid      | 0.908 (0.877–0.931)           |
| 32  | L4L5 post     | 0.909 (0.89–0.925)            |
| 33  | L5S1 ant      | 0.917 (0.899–0.932)           |
| 34  | L5S1 mid      | 0.929 (0.914–0.942)           |
| 35  | L5S1 post     | 0.921 (0.904–0.935)           |

**Table S3.** Two subsets of crucial features for two baseline ML models.

| No. | Cage height prediction model | Postoperative PI-LL prediction model |
|-----|------------------------------|--------------------------------------|
| 1   | L4L5 mid                     | LL                                   |
| 2   | L3L4 mid                     | RLL                                  |
| 3   | LL                           | PI                                   |
| 4   | L3L4 post                    | SS                                   |
| 5   | L5S1 mid                     | PT                                   |
| 6   | L3Width Up                   | L5S1 angle                           |
| 7   | PI                           | L5Height Ant                         |
| 8   | L4L5 ant                     | L3Height Post                        |
| 9   | L3L4 ant                     | L3 angle                             |
| 10  | L4L5 angle                   | L2Height Post                        |
| 11  | PImLL before                 | Age                                  |
| 12  | Gender                       | L4S1 angle                           |

|    |               |              |
|----|---------------|--------------|
| 13 | L2L3 angle    | L1L2 angle   |
| 14 | LDI           | L3L4 angle   |
| 15 | L3 angle      | PImLL before |
| 16 | L4S1 angle    | L4L5 angle   |
| 17 | L2Height Ant  | L1Width Up   |
| 18 | L3Width Down  | L3Width Down |
| 19 | L2Height Post | L4Width Up   |
| 20 | L5 angle      | L4Height Ant |
| 21 | L4Width Down  | L1 angle     |
| 22 | L5Width Down  | L4L5 post    |
| 23 | L2L3 post     | Gender       |
| 24 | —             | Body Height  |
